# Supplementary material for: Separation and Identification of HSP‐Associated Protein Complexes from Pancreatic Cancer Cell Lines Using 2D CN/SDS‐PAGE Coupled with Mass Spectrometry
Source: Hindawi journal article supplement (doi:10.1155/2011/193052), 2011-01-01
Supplement: f1 [file 193052.f1.doc]

**Supporting information**

**Separation and identification of HSP-associated protein complexes from pancreatic cancer cell lines using** 2D CN/SDS-PAGE coupled with mass spectrometry

**Running Title:** **Separation and identification of HSP-associated protein complexes**

**Zhiyun Zhao, Hui Liu, Xinli Wang, Xiaodong Wang, Zhili Li***

Department of Biophysics and Structural Biology, Institute of Basic Medical Sciences, Chinese Academy of Medical Sciences and School of Basic Medicine, Peking Union Medical College, Beijing, China

***Correspondence:**

Prof. Zhili Li, Department of Biophysics and Structural Biology, Institute of Basic Medical Sciences, Chinese Academy of Medical Sciences and School of Basic Medicine, Peking Union Medical College, 5 Dong Dan San Tiao, Beijing 100005, China

**E-mail:** [lizhili@ibms.pumc.edu.cn](mailto:lizhili@ibms.pumc.edu.cn)

**Phone: +**86-10-65296479

**Fax: +**86-10-65263815

**Table S1. The identification results of proteins in figure 1 by MALDI-MS and MS/MS**

| Band  number | Swiss-Prot  Accession number | Protein Name | Alterative Name | Theoretical MW (Da) | Score | Sequence  Coverage  (%) | Number of matched MS/MS |
| --- | --- | --- | --- | --- | --- | --- | --- |
| 1 | **P10809** | 60 kDa heat shock protein, mitochondrial | HSP60 | 61187 | 119 | 25 | 2 |
| 2 | **Q9Y4L1** | Hypoxia up-regulated protein 1 | ORP-150 | 111494 | 90 | 9 | 1 |
| 3 | **P14625** | Endoplasmin | GRP-94 | 92696 | 327 | 31 | 2 |
| 4 | **P07900**  P08238 | Heat shock protein HSP 90-alpha  Heat shock protein HSP 90-beta | HSP90  HSP90beta | 85006  83554 | 535  422 | 31  26 | 4  3 |
| 5 | **P11021** | 78 kDa glucose-regulated protein | BiP | 72402 | 167 | 27 | 0 |
| 6 | **P11142** | Heat shock cognate 71 kDa protein | HSP71 | 71082 | 324 | 29 | 3 |
| 7 | **P30101** | Protein disulfide-isomerase A3 | ERp57 | 57146 | 279 | 31 | 3 |
| 8 | **Q15084** | Protein disulfide-isomerase A6 | ERp5 | 48490 | 156 | 18 | 2 |
| 9 | **O43707** | Alpha-actinin-4 | Non-muscle alpha-actinin 4 | 105245 | 500 | 35 | 3 |
| 10 | **P23368** | NAD-dependent malic enzyme, mitochondrial | NAD-ME | 66029 | 72 | 12 | 1 |
| 11 | **P23526** | Adenosylhomocysteinase | SAHase | 48255 | 74 | 10 | 0 |
| 12 | **P00338** | L-lactate dehydrogenase A chain | LDH-A | 36950 | 94 | 18 | 1 |
| 13 | **P60709** | Actin, cytoplasmic 1 | Beta-actin | 42052 | 128 | 29 | 1 |
| 14 | **P63261** | Actin, cytoplasmic 2 | Gamma-actin | 42108 | 128 | 29 | 1 |
| 15 | **P18669** | Phosphoglycerate mutase 1 | PGAM-B | 28900 | 150 | 55 | 0 |

**Table S2. The identification results of proteins in figure 3 by MALDI- MS and MS/MS**

| Spot  number | Swiss-Prot  Accession number | Protein Name | Alterative Name | Theoretical MW (Da) | Score | Sequence  Coverage  (%) | Number of matched MS/MS |
| --- | --- | --- | --- | --- | --- | --- | --- |
| 1 | **P55072** | Transitional endoplasmic reticulum ATPase | TER ATPase | 89950 | 130 | 19 | 0 |
| 2 | **P10809** | 60 kDa heat shock protein, mitochondrial | HSP60 | 61187 | 474 | 32 | 2 |
| 3 | **P21980** | Protein-glutamine gamma-  glutamyltransferase 2 | Transglutaminase-2 | 78420 | 119 | 13 | 1 |
| 4 | **P13667** | Protein disulfide-isomerase A4 | ERp72 | 73229 | 268 | 23 | 3 |
| 5 | **P08133** | Annexin A6 | Annexin VI | 76168 | 416 | 46 | 2 |
